# Supplementary material
Source: PubMed Central journal article supplement (PMC2676165)
Supplement: NIHMS103604-supplement-2.pdf [file NIHMS103604-supplement-2.pdf]

## Supplementary Figure 1

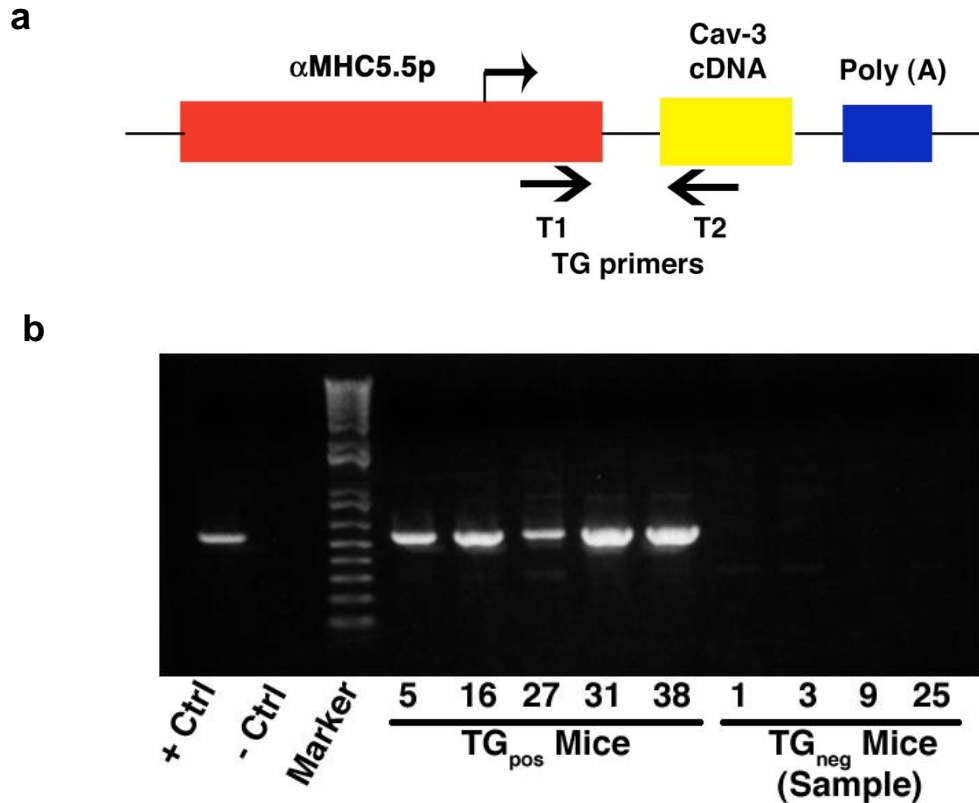

**Supplementary Figure 1** Generation of a cardiac myocyte specific caveolin-3 (Cav-3) transgenic mouse. **(a)** Schematic of Cav-3 construct. Full-length cDNA for mouse Cav-3 (~489bp) was cloned into a vector containing the  $\alpha$ -myosin heavy chain promoter ( $\alpha$ MHC) to facilitate cardiac myocyte-specific expression of Cav-3. **(b)** PCR products using transgenic (TG) primers (from **(a)**) for positive control vector DNA, negative control, and tail snip genomic DNA of TG-positive and TG-negative (TGneg) mice were run on an agarose gel. Five mice were Cav-3 TG positive (Cav-3 OE).

## Supplementary Figure 2

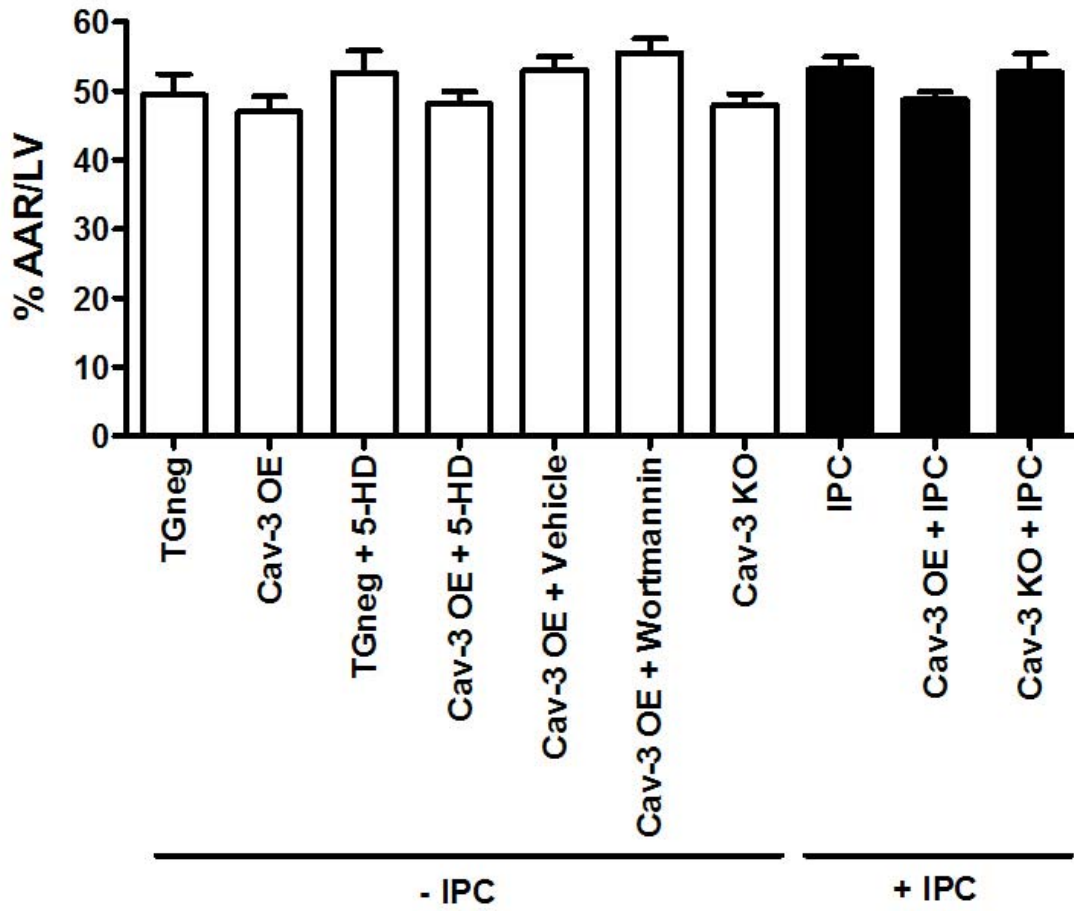

**Supplementary Figure 2** Area at risk (AAR) as a percent of the left ventricle (LV) was no different among the groups.

**Table 1. Hemodynamics**

|                                                                                | <b>Baseline</b> | <b>Pre-occlusion</b> | <b>Ischemia<br/>30 min</b> | <b>Reperfusion<br/>120 min</b> |
|--------------------------------------------------------------------------------|-----------------|----------------------|----------------------------|--------------------------------|
| <b>Heart rate, beats · min<sup>-1</sup></b>                                    |                 |                      |                            |                                |
| TGneg                                                                          | 457 ± 7         | 453 ± 8              | 431 ± 17                   | 430 ± 19                       |
| Cav-3 OE                                                                       | 440 ± 7         | 442 ± 9              | 429 ± 12                   | 440 ± 11                       |
| TGneg + 5-HD                                                                   | 439 ± 13        | 427 ± 10             | 424 ± 18                   | 416 ± 10                       |
| Cav-3 OE + 5-HD                                                                | 465 ± 11        | 439 ± 12             | 425 ± 10*                  | 413 ± 11*                      |
| Cav-3 OE + Wortmannin                                                          | 435 ± 7         | 441 ± 9              | 427 ± 10                   | 418 ± 11                       |
| Cav-3 OE + Vehicle                                                             | 448 ± 12        | 442 ± 12             | 428 ± 14                   | 426 ± 12                       |
| Cav-3 KO                                                                       | 438 ± 7         | 428 ± 12             | 414 ± 13                   | 406 ± 14                       |
| IPC                                                                            | 452 ± 13        | 444 ± 15             | 430 ± 12                   | 428 ± 15                       |
| Cav-3 OE + IPC                                                                 | 443 ± 20        | 428 ± 15             | 441 ± 23                   | 425 ± 13                       |
| Cav-3 KO + IPC                                                                 | 450 ± 21        | 422 ± 20             | 412 ± 23                   | 417 ± 13                       |
| <b>Mean arterial pressure, mmHg</b>                                            |                 |                      |                            |                                |
| TGneg                                                                          | 74 ± 2          | 71 ± 2               | 67 ± 3                     | 59 ± 2*§                       |
| Cav-3 OE                                                                       | 75 ± 2          | 72 ± 2               | 67 ± 2*                    | 69 ± 2                         |
| TGneg + 5-HD                                                                   | 72 ± 2          | 69 ± 2               | 61 ± 1*†                   | 57 ± 1*§                       |
| Cav-3 OE + 5-HD                                                                | 73 ± 2          | 71 ± 2               | 62 ± 2*                    | 58 ± 2*§                       |
| Cav-3 OE + Wortmannin                                                          | 75 ± 2          | 73 ± 2               | 62 ± 2*                    | 59 ± 2*§                       |
| Cav-3 OE + Vehicle                                                             | 72 ± 2          | 71 ± 2               | 69 ± 1                     | 66 ± 2                         |
| Cav-3 KO                                                                       | 75 ± 2          | 73 ± 2               | 61 ± 3*†                   | 58 ± 3*§                       |
| IPC                                                                            | 71 ± 1          | 69 ± 1               | 71 ± 1                     | 66 ± 1*                        |
| Cav-3 OE + IPC                                                                 | 72 ± 3          | 70 ± 3               | 65 ± 2                     | 66 ± 2                         |
| Cav-3 KO + IPC                                                                 | 73 ± 2          | 69 ± 3               | 63 ± 1*                    | 56 ± 1*§†                      |
| <b>Rate-pressure product, beats · min<sup>-1</sup> · mmHg · 10<sup>3</sup></b> |                 |                      |                            |                                |
| TGneg                                                                          | 33.7 ± 1.1      | 32.4 ± 1.5           | 28.8 ± 1.9                 | 25.3 ± 1.8*                    |
| Cav-3 OE                                                                       | 33.0 ± 1.0      | 31.7 ± 0.7           | 28.8 ± 0.8*                | 30.3 ± 0.8                     |
| TGneg + 5-HD                                                                   | 31.8 ± 1.5      | 29.4 ± 1.1           | 26.0 ± 1.2*                | 23.9 ± 0.9*§                   |
| Cav-3 OE + 5-HD                                                                | 33.9 ± 1.3      | 31.3 ± 1.5           | 26.5 ± 1.1*                | 23.8 ± 1.0*§                   |
| Cav-3 OE + Wortmannin                                                          | 32.4 ± 1.0      | 32.1 ± 1.1           | 26.5 ± 0.9*                | 24.7 ± 1.2*                    |
| Cav-3 OE + Vehicle                                                             | 32.1 ± 1.0      | 31.3 ± 0.8           | 29.6 ± 1.0                 | 28.0 ± 0.9*                    |
| Cav-3 KO                                                                       | 32.9 ± 0.9      | 31.3 ± 1.3           | 25.2 ± 1.0*                | 23.7 ± 1.4*§                   |
| IPC                                                                            | 32.0 ± 1.1      | 30.7 ± 1.3           | 30.4 ± 0.8                 | 28.3 ± 1.2                     |
| Cav-3 OE + IPC                                                                 | 32.0 ± 2.1      | 30.0 ± 1.9           | 28.8 ± 1.7                 | 27.9 ± 1.3                     |
| Cav-3 KO + IPC                                                                 | 32.7 ± 1.7      | 27.5 ± 1.8           | 25.7 ± 1.2*                | 23.5 ± 0.6*§                   |

Data are mean ± SEM. n=6-11 per group. Abbreviations are: TGneg, transgenic-negative; Cav-3 OE, caveolin-3 overexpression; 5-HD, 5-hydroxydecanoate; Cav-3 KO, caveolin-3 knockout; IPC, ischemic preconditioning. \* Significantly ( $p < 0.05$ ) different from baseline (intragroup comparison). § Significantly ( $p < 0.05$ ) different from Cav-3 OE (intergroup comparison). † Significantly ( $p < 0.05$ ) different from IPC (intergroup comparison).

**Table 2. Morphology, echocardiography and hemodynamics**

|                                                           | TGneg mice  | Cav-3 OE mice |
|-----------------------------------------------------------|-------------|---------------|
| Heart Weight/Tibia Length (mg/mm)                         | 6.3 ± 0.5   | 5.9 ± 0.4     |
| Echocardiography                                          |             |               |
| AWd (mm)                                                  | 0.79 ± 0.04 | 0.86 ± 0.01   |
| LVIDd (mm)                                                | 3.62 ± 0.14 | 3.68 ± 0.11   |
| PWd (mm)                                                  | 0.86 ± 0.02 | 0.90 ± 0.01   |
| AWs (mm)                                                  | 1.24 ± 0.07 | 1.28 ± 0.07   |
| LVIDs (mm)                                                | 2.17 ± 0.12 | 2.31 ± 0.12   |
| PWs (mm)                                                  | 1.32 ± 0.05 | 1.20 ± 0.05   |
| FS (%)                                                    | 39.9 ± 3.3  | 37.5 ± 2.3    |
| Hemodynamics                                              |             |               |
| HR (beats/min)                                            | 431 ± 14    | 436 ± 16      |
| MAP (mmHg)                                                | 72 ± 4      | 72 ± 2        |
| RPP (beats · min <sup>-1</sup> · mmHg · 10 <sup>3</sup> ) | 31.2 ± 2.2  | 31.6 ± 1.6    |

Values are mean ± SEM. n = 9-10. Abbreviations are: TGneg, transgenic-negative; Cav-3 OE, caveolin-3 overexpression; AWd and AWs, anterior wall thickness in diastole and systole, respectively; LVIDd and LVIDs, left ventricular internal cavity diameter in diastole and systole, respectively; PWd and PWs, posterior wall thickness in diastole and systole, respectively; FS, fractional shortening; HR, heart rate; MAP, mean arterial pressure; RPP, rate-pressure product.
